# Supplementary material for: The Global Trend of Microplastic Research in Freshwater Ecosystems
Source: MDPI journal article supplement (doi:10.3390/toxics11060539), 2023-06-17
Supplement: s1 [file s1]

## **Supporting information**

### **The Global Trend of Microplastic Research in Freshwater Ecosystems**

Yaochun Wang<sup>1</sup>, Guohao Liu<sup>1</sup>, Yixia Wang<sup>1</sup>, Hongli Mu<sup>1</sup>, Xiaoli Shi<sup>1</sup>, Chao Wang<sup>2</sup>, Naicheng Wu<sup>1\*</sup>

<sup>1</sup> Department of Geography and Spatial Information Techniques, Ningbo University, Ningbo 315211, China

<sup>2</sup> Pearl River Fisheries Research Institute, Chinese Academy of Fishery Sciences, Guangzhou 510380, China

\* Corresponding author: Naicheng Wu (naichengwu88@gmail.com)

Table S1. Countries involved in microplastics-related research and the volume of their publications, 2013-2017

| From       | To             | Frequency |
|------------|----------------|-----------|
| ARGENTINA  | URUGUAY        | 2         |
| AUSTRALIA  | BANGLADESH     | 1         |
| AUSTRALIA  | BRUNEI         | 1         |
| AUSTRALIA  | EGYPT          | 1         |
| AUSTRALIA  | GHANA          | 1         |
| AUSTRALIA  | IRAN           | 1         |
| AUSTRALIA  | LITHUANIA      | 1         |
| AUSTRALIA  | MALAYSIA       | 1         |
| AUSTRALIA  | NORWAY         | 1         |
| AUSTRALIA  | PAKISTAN       | 1         |
| AUSTRALIA  | POLAND         | 1         |
| AUSTRALIA  | RUSSIA         | 2         |
| AUSTRALIA  | SAUDI ARABIA   | 1         |
| AUSTRALIA  | THAILAND       | 1         |
| AUSTRALIA  | VIETNAM        | 1         |
| BANGLADESH | BRUNEI         | 1         |
| BANGLADESH | EGYPT          | 1         |
| BANGLADESH | SAUDI ARABIA   | 1         |
| BELGIUM    | BOLIVIA        | 1         |
| BRAZIL     | ARGENTINA      | 1         |
| BRAZIL     | CHILE          | 1         |
| BRAZIL     | ECUADOR        | 2         |
| BRAZIL     | MEXICO         | 1         |
| BRAZIL     | PANAMA         | 1         |
| CANADA     | BRAZIL         | 1         |
| CANADA     | FINLAND        | 1         |
| CANADA     | FRANCE         | 1         |
| CANADA     | SPAIN          | 1         |
| CANADA     | SWEDEN         | 1         |
| CANADA     | SWITZERLAND    | 1         |
| CHILE      | PANAMA         | 1         |
| CHINA      | AUSTRALIA      | 7         |
| CHINA      | BANGLADESH     | 1         |
| CHINA      | BELGIUM        | 3         |
| CHINA      | CANADA         | 7         |
| CHINA      | COLOMBIA       | 1         |
| CHINA      | CZECH REPUBLIC | 2         |
| CHINA      | DENMARK        | 3         |
| CHINA      | EGYPT          | 1         |
| CHINA      | FINLAND        | 1         |
| CHINA      | GERMANY        | 2         |

|                |                |    |
|----------------|----------------|----|
| CHINA          | INDIA          | 3  |
| CHINA          | INDONESIA      | 2  |
| CHINA          | ITALY          | 2  |
| CHINA          | KOREA          | 3  |
| CHINA          | MALAYSIA       | 3  |
| CHINA          | NETHERLANDS    | 1  |
| CHINA          | NEW ZEALAND    | 1  |
| CHINA          | NORWAY         | 1  |
| CHINA          | PAKISTAN       | 1  |
| CHINA          | RUSSIA         | 1  |
| CHINA          | SAUDI ARABIA   | 2  |
| CHINA          | SPAIN          | 2  |
| CHINA          | SWEDEN         | 1  |
| CHINA          | SWITZERLAND    | 2  |
| CHINA          | THAILAND       | 2  |
| CHINA          | UNITED KINGDOM | 11 |
| CHINA          | USA            | 14 |
| CZECH REPUBLIC | SERBIA         | 1  |
| ECUADOR        | MEXICO         | 2  |
| EGYPT          | BRUNEI         | 1  |
| ESTONIA        | SLOVENIA       | 1  |
| FIJI           | BELIZE         | 1  |
| FINLAND        | AUSTRIA        | 1  |
| FINLAND        | SOUTH AFRICA   | 3  |
| FINLAND        | SWEDEN         | 1  |
| FINLAND        | SWITZERLAND    | 1  |
| FINLAND        | TANZANIA       | 1  |
| FRANCE         | BELGIUM        | 1  |
| FRANCE         | ECUADOR        | 1  |
| FRANCE         | KUWAIT         | 1  |
| FRANCE         | MEXICO         | 1  |
| FRANCE         | SWITZERLAND    | 2  |
| FRANCE         | TUNISIA        | 1  |
| FRANCE         | VIETNAM        | 3  |
| GERMANY        | CANADA         | 1  |
| GERMANY        | COSTA RICA     | 1  |
| GERMANY        | ESTONIA        | 1  |
| GERMANY        | FINLAND        | 4  |
| GERMANY        | FRANCE         | 1  |
| GERMANY        | INDIA          | 1  |
| GERMANY        | IRELAND        | 2  |
| GERMANY        | ITALY          | 5  |
| GERMANY        | NETHERLANDS    | 4  |
| GERMANY        | NEW ZEALAND    | 1  |

|           |                |   |
|-----------|----------------|---|
| GERMANY   | NIGERIA        | 2 |
| GERMANY   | NORWAY         | 6 |
| GERMANY   | ROMANIA        | 1 |
| GERMANY   | SOUTH AFRICA   | 2 |
| GERMANY   | SPAIN          | 1 |
| GERMANY   | SWEDEN         | 2 |
| GERMANY   | SWITZERLAND    | 2 |
| GERMANY   | UNITED KINGDOM | 3 |
| INDIA     | AUSTRALIA      | 1 |
| INDIA     | BANGLADESH     | 2 |
| INDIA     | BRUNEI         | 1 |
| INDIA     | CZECH REPUBLIC | 1 |
| INDIA     | EGYPT          | 1 |
| INDIA     | ETHIOPIA       | 1 |
| INDIA     | FINLAND        | 1 |
| INDIA     | JAPAN          | 1 |
| INDIA     | KOREA          | 2 |
| INDIA     | MALAYSIA       | 2 |
| INDIA     | MEXICO         | 2 |
| INDIA     | NETHERLANDS    | 1 |
| INDIA     | SAUDI ARABIA   | 3 |
| INDIA     | SOUTH AFRICA   | 1 |
| INDIA     | SWEDEN         | 1 |
| INDIA     | VIETNAM        | 1 |
| INDIA     | ZAMBIA         | 1 |
| INDONESIA | MALAYSIA       | 2 |
| INDONESIA | SAUDI ARABIA   | 1 |
| IRAN      | BELGIUM        | 1 |
| IRAN      | FRANCE         | 1 |
| IRAN      | LITHUANIA      | 2 |
| IRAN      | POLAND         | 3 |
| ITALY     | AUSTRALIA      | 1 |
| ITALY     | BRAZIL         | 1 |
| ITALY     | COSTA RICA     | 1 |
| ITALY     | FINLAND        | 1 |
| ITALY     | IRAN           | 1 |
| ITALY     | LITHUANIA      | 1 |
| ITALY     | POLAND         | 1 |
| ITALY     | RUSSIA         | 1 |
| ITALY     | SAUDI ARABIA   | 1 |
| ITALY     | SWEDEN         | 1 |
| ITALY     | SWITZERLAND    | 1 |
| JAPAN     | BANGLADESH     | 1 |
| JAPAN     | INDONESIA      | 1 |

|              |                 |   |
|--------------|-----------------|---|
| JAPAN        | MONGOLIA        | 1 |
| JAPAN        | RUSSIA          | 1 |
| JAPAN        | SOUTH AFRICA    | 1 |
| JAPAN        | THAILAND        | 2 |
| KOREA        | BANGLADESH      | 1 |
| KOREA        | EGYPT           | 1 |
| KOREA        | INDONESIA       | 1 |
| KOREA        | MALAYSIA        | 1 |
| KOREA        | SAUDI ARABIA    | 2 |
| KOREA        | ZAMBIA          | 1 |
| KUWAIT       | U ARAB EMIRATES | 1 |
| MALAYSIA     | BANGLADESH      | 1 |
| MALAYSIA     | BRUNEI          | 1 |
| MALAYSIA     | EGYPT           | 1 |
| MALAYSIA     | SAUDI ARABIA    | 2 |
| MALAYSIA     | SOUTH AFRICA    | 1 |
| MALAYSIA     | THAILAND        | 1 |
| MEXICO       | ETHIOPIA        | 1 |
| NETHERLANDS  | ETHIOPIA        | 1 |
| NETHERLANDS  | IRELAND         | 2 |
| NETHERLANDS  | NEW ZEALAND     | 1 |
| NETHERLANDS  | UKRAINE         | 1 |
| NORWAY       | CZECH REPUBLIC  | 1 |
| NORWAY       | DENMARK         | 1 |
| NORWAY       | NIGERIA         | 1 |
| PAKISTAN     | HUNGARY         | 1 |
| PAKISTAN     | SAUDI ARABIA    | 1 |
| POLAND       | LITHUANIA       | 2 |
| PORTUGAL     | AUSTRIA         | 1 |
| PORTUGAL     | BRAZIL          | 1 |
| PORTUGAL     | CZECH REPUBLIC  | 1 |
| RUSSIA       | NORWAY          | 2 |
| SAUDI ARABIA | BRUNEI          | 1 |
| SAUDI ARABIA | EGYPT           | 1 |
| SAUDI ARABIA | ZAMBIA          | 1 |
| SOUTH AFRICA | GHANA           | 1 |
| SPAIN        | ARGENTINA       | 1 |
| SPAIN        | BELGIUM         | 3 |
| SPAIN        | BELIZE          | 1 |
| SPAIN        | BRAZIL          | 2 |
| SPAIN        | CHILE           | 2 |
| SPAIN        | CZECH REPUBLIC  | 1 |
| SPAIN        | DENMARK         | 1 |
| SPAIN        | ECUADOR         | 1 |

|                |                |   |
|----------------|----------------|---|
| SPAIN          | FIJI           | 1 |
| SPAIN          | FINLAND        | 1 |
| SPAIN          | FRANCE         | 3 |
| SPAIN          | MEXICO         | 2 |
| SPAIN          | NORWAY         | 1 |
| SPAIN          | PANAMA         | 1 |
| SPAIN          | PORTUGAL       | 1 |
| SPAIN          | SAUDI ARABIA   | 2 |
| SPAIN          | SWITZERLAND    | 1 |
| SPAIN          | URUGUAY        | 1 |
| SWEDEN         | ICELAND        | 1 |
| SWEDEN         | IRELAND        | 1 |
| SWEDEN         | SAUDI ARABIA   | 1 |
| THAILAND       | NEPAL          | 2 |
| TURKEY         | CZECH REPUBLIC | 1 |
| TURKEY         | SERBIA         | 1 |
| UNITED KINGDOM | AUSTRALIA      | 1 |
| UNITED KINGDOM | BANGLADESH     | 1 |
| UNITED KINGDOM | BELGIUM        | 1 |
| UNITED KINGDOM | COLOMBIA       | 1 |
| UNITED KINGDOM | CZECH REPUBLIC | 1 |
| UNITED KINGDOM | DENMARK        | 4 |
| UNITED KINGDOM | FRANCE         | 5 |
| UNITED KINGDOM | INDIA          | 1 |
| UNITED KINGDOM | INDONESIA      | 1 |
| UNITED KINGDOM | IRAN           | 5 |
| UNITED KINGDOM | IRELAND        | 1 |
| UNITED KINGDOM | KOREA          | 1 |
| UNITED KINGDOM | LITHUANIA      | 1 |
| UNITED KINGDOM | NETHERLANDS    | 2 |
| UNITED KINGDOM | NEW ZEALAND    | 1 |
| UNITED KINGDOM | NORWAY         | 3 |
| UNITED KINGDOM | POLAND         | 2 |
| UNITED KINGDOM | ROMANIA        | 1 |
| UNITED KINGDOM | RUSSIA         | 1 |
| UNITED KINGDOM | SERBIA         | 1 |
| UNITED KINGDOM | SPAIN          | 1 |
| UNITED KINGDOM | SWEDEN         | 1 |
| UNITED KINGDOM | SWITZERLAND    | 1 |
| UNITED KINGDOM | TURKEY         | 1 |
| USA            | ARGENTINA      | 1 |
| USA            | AUSTRALIA      | 1 |
| USA            | BANGLADESH     | 2 |
| USA            | BRAZIL         | 1 |

|         |                |   |
|---------|----------------|---|
| USA     | CANADA         | 5 |
| USA     | COLOMBIA       | 1 |
| USA     | CROATIA        | 2 |
| USA     | CZECH REPUBLIC | 2 |
| USA     | DENMARK        | 2 |
| USA     | FRANCE         | 3 |
| USA     | GERMANY        | 2 |
| USA     | INDIA          | 2 |
| USA     | ITALY          | 1 |
| USA     | JAPAN          | 1 |
| USA     | KOREA          | 2 |
| USA     | KUWAIT         | 1 |
| USA     | PAKISTAN       | 1 |
| USA     | RUSSIA         | 1 |
| USA     | SAUDI ARABIA   | 1 |
| USA     | SERBIA         | 2 |
| USA     | SPAIN          | 3 |
| USA     | SWEDEN         | 1 |
| USA     | TURKEY         | 1 |
| USA     | UNITED KINGDOM | 5 |
| VIETNAM | MEXICO         | 1 |

Table S2. Countries involved in microplastics-related research and the volume of their publications, 2018-2022

| From       | To           | Frequency |
|------------|--------------|-----------|
| ARGENTINA  | URUGUAY      | 2         |
| AUSTRALIA  | BANGLADESH   | 1         |
| AUSTRALIA  | BRUNEI       | 1         |
| AUSTRALIA  | EGYPT        | 1         |
| AUSTRALIA  | GHANA        | 1         |
| AUSTRALIA  | IRAN         | 1         |
| AUSTRALIA  | LITHUANIA    | 1         |
| AUSTRALIA  | MALAYSIA     | 1         |
| AUSTRALIA  | NORWAY       | 1         |
| AUSTRALIA  | PAKISTAN     | 1         |
| AUSTRALIA  | POLAND       | 1         |
| AUSTRALIA  | RUSSIA       | 2         |
| AUSTRALIA  | SAUDI ARABIA | 1         |
| AUSTRALIA  | THAILAND     | 1         |
| AUSTRALIA  | VIETNAM      | 1         |
| BANGLADESH | BRUNEI       | 1         |
| BANGLADESH | EGYPT        | 1         |
| BANGLADESH | SAUDI ARABIA | 1         |
| BELGIUM    | BOLIVIA      | 1         |

|                |                |    |
|----------------|----------------|----|
| BRAZIL         | ARGENTINA      | 1  |
| BRAZIL         | CHILE          | 1  |
| BRAZIL         | ECUADOR        | 2  |
| BRAZIL         | MEXICO         | 1  |
| BRAZIL         | PANAMA         | 1  |
| CANADA         | BRAZIL         | 1  |
| CANADA         | FINLAND        | 1  |
| CANADA         | FRANCE         | 1  |
| CANADA         | SPAIN          | 1  |
| CANADA         | SWEDEN         | 1  |
| CANADA         | SWITZERLAND    | 1  |
| CHILE          | PANAMA         | 1  |
| CHINA          | AUSTRALIA      | 7  |
| CHINA          | BANGLADESH     | 1  |
| CHINA          | BELGIUM        | 3  |
| CHINA          | CANADA         | 7  |
| CHINA          | COLOMBIA       | 1  |
| CHINA          | CZECH REPUBLIC | 2  |
| CHINA          | DENMARK        | 3  |
| CHINA          | EGYPT          | 1  |
| CHINA          | FINLAND        | 1  |
| CHINA          | GERMANY        | 2  |
| CHINA          | INDIA          | 3  |
| CHINA          | INDONESIA      | 2  |
| CHINA          | ITALY          | 2  |
| CHINA          | KOREA          | 3  |
| CHINA          | MALAYSIA       | 3  |
| CHINA          | NETHERLANDS    | 1  |
| CHINA          | NEW ZEALAND    | 1  |
| CHINA          | NORWAY         | 1  |
| CHINA          | PAKISTAN       | 1  |
| CHINA          | RUSSIA         | 1  |
| CHINA          | SAUDI ARABIA   | 2  |
| CHINA          | SPAIN          | 2  |
| CHINA          | SWEDEN         | 1  |
| CHINA          | SWITZERLAND    | 2  |
| CHINA          | THAILAND       | 2  |
| CHINA          | UNITED KINGDOM | 11 |
| CHINA          | USA            | 14 |
| CZECH REPUBLIC | SERBIA         | 1  |
| ECUADOR        | MEXICO         | 2  |
| EGYPT          | BRUNEI         | 1  |
| ESTONIA        | SLOVENIA       | 1  |
| FIJI           | BELIZE         | 1  |



|         |                |   |
|---------|----------------|---|
| FINLAND | AUSTRIA        | 1 |
| FINLAND | SOUTH AFRICA   | 3 |
| FINLAND | SWEDEN         | 1 |
| FINLAND | SWITZERLAND    | 1 |
| FINLAND | TANZANIA       | 1 |
| FRANCE  | BELGIUM        | 1 |
| FRANCE  | ECUADOR        | 1 |
| FRANCE  | KUWAIT         | 1 |
| FRANCE  | MEXICO         | 1 |
| FRANCE  | SWITZERLAND    | 2 |
| FRANCE  | TUNISIA        | 1 |
| FRANCE  | VIETNAM        | 3 |
| GERMANY | CANADA         | 1 |
| GERMANY | COSTA RICA     | 1 |
| GERMANY | ESTONIA        | 1 |
| GERMANY | FINLAND        | 4 |
| GERMANY | FRANCE         | 1 |
| GERMANY | INDIA          | 1 |
| GERMANY | IRELAND        | 2 |
| GERMANY | ITALY          | 5 |
| GERMANY | NETHERLANDS    | 4 |
| GERMANY | NEW ZEALAND    | 1 |
| GERMANY | NIGERIA        | 2 |
| GERMANY | NORWAY         | 6 |
| GERMANY | ROMANIA        | 1 |
| GERMANY | SOUTH AFRICA   | 2 |
| GERMANY | SPAIN          | 1 |
| GERMANY | SWEDEN         | 2 |
| GERMANY | SWITZERLAND    | 2 |
| GERMANY | UNITED KINGDOM | 3 |
| INDIA   | AUSTRALIA      | 1 |
| INDIA   | BANGLADESH     | 2 |
| INDIA   | BRUNEI         | 1 |
| INDIA   | CZECH REPUBLIC | 1 |
| INDIA   | EGYPT          | 1 |
| INDIA   | ETHIOPIA       | 1 |
| INDIA   | FINLAND        | 1 |
| INDIA   | JAPAN          | 1 |
| INDIA   | KOREA          | 2 |
| INDIA   | MALAYSIA       | 2 |
| INDIA   | MEXICO         | 2 |
| INDIA   | NETHERLANDS    | 1 |
| INDIA   | SAUDI ARABIA   | 3 |
| INDIA   | SOUTH AFRICA   | 1 |

|             |                 |   |
|-------------|-----------------|---|
| INDIA       | SWEDEN          | 1 |
| INDIA       | VIETNAM         | 1 |
| INDIA       | ZAMBIA          | 1 |
| INDONESIA   | MALAYSIA        | 2 |
| INDONESIA   | SAUDI ARABIA    | 1 |
| IRAN        | BELGIUM         | 1 |
| IRAN        | FRANCE          | 1 |
| IRAN        | LITHUANIA       | 2 |
| IRAN        | POLAND          | 3 |
| ITALY       | AUSTRALIA       | 1 |
| ITALY       | BRAZIL          | 1 |
| ITALY       | COSTA RICA      | 1 |
| ITALY       | FINLAND         | 1 |
| ITALY       | IRAN            | 1 |
| ITALY       | LITHUANIA       | 1 |
| ITALY       | POLAND          | 1 |
| ITALY       | RUSSIA          | 1 |
| ITALY       | SAUDI ARABIA    | 1 |
| ITALY       | SWEDEN          | 1 |
| ITALY       | SWITZERLAND     | 1 |
| JAPAN       | BANGLADESH      | 1 |
| JAPAN       | INDONESIA       | 1 |
| JAPAN       | MONGOLIA        | 1 |
| JAPAN       | RUSSIA          | 1 |
| JAPAN       | SOUTH AFRICA    | 1 |
| JAPAN       | THAILAND        | 2 |
| KOREA       | BANGLADESH      | 1 |
| KOREA       | EGYPT           | 1 |
| KOREA       | INDONESIA       | 1 |
| KOREA       | MALAYSIA        | 1 |
| KOREA       | SAUDI ARABIA    | 2 |
| KOREA       | ZAMBIA          | 1 |
| KUWAIT      | U ARAB EMIRATES | 1 |
| MALAYSIA    | BANGLADESH      | 1 |
| MALAYSIA    | BRUNEI          | 1 |
| MALAYSIA    | EGYPT           | 1 |
| MALAYSIA    | SAUDI ARABIA    | 2 |
| MALAYSIA    | SOUTH AFRICA    | 1 |
| MALAYSIA    | THAILAND        | 1 |
| MEXICO      | ETHIOPIA        | 1 |
| NETHERLANDS | ETHIOPIA        | 1 |
| NETHERLANDS | IRELAND         | 2 |
| NETHERLANDS | NEW ZEALAND     | 1 |
| NETHERLANDS | UKRAINE         | 1 |

|                |                |   |
|----------------|----------------|---|
| NORWAY         | CZECH REPUBLIC | 1 |
| NORWAY         | DENMARK        | 1 |
| NORWAY         | NIGERIA        | 1 |
| PAKISTAN       | HUNGARY        | 1 |
| PAKISTAN       | SAUDI ARABIA   | 1 |
| POLAND         | LITHUANIA      | 2 |
| PORTUGAL       | AUSTRIA        | 1 |
| PORTUGAL       | BRAZIL         | 1 |
| PORTUGAL       | CZECH REPUBLIC | 1 |
| RUSSIA         | NORWAY         | 2 |
| SAUDI ARABIA   | BRUNEI         | 1 |
| SAUDI ARABIA   | EGYPT          | 1 |
| SAUDI ARABIA   | ZAMBIA         | 1 |
| SOUTH AFRICA   | GHANA          | 1 |
| SPAIN          | ARGENTINA      | 1 |
| SPAIN          | BELGIUM        | 3 |
| SPAIN          | BELIZE         | 1 |
| SPAIN          | BRAZIL         | 2 |
| SPAIN          | CHILE          | 2 |
| SPAIN          | CZECH REPUBLIC | 1 |
| SPAIN          | DENMARK        | 1 |
| SPAIN          | ECUADOR        | 1 |
| SPAIN          | FIJI           | 1 |
| SPAIN          | FINLAND        | 1 |
| SPAIN          | FRANCE         | 3 |
| SPAIN          | MEXICO         | 2 |
| SPAIN          | NORWAY         | 1 |
| SPAIN          | PANAMA         | 1 |
| SPAIN          | PORTUGAL       | 1 |
| SPAIN          | SAUDI ARABIA   | 2 |
| SPAIN          | SWITZERLAND    | 1 |
| SPAIN          | URUGUAY        | 1 |
| SWEDEN         | ICELAND        | 1 |
| SWEDEN         | IRELAND        | 1 |
| SWEDEN         | SAUDI ARABIA   | 1 |
| THAILAND       | NEPAL          | 2 |
| TURKEY         | CZECH REPUBLIC | 1 |
| TURKEY         | SERBIA         | 1 |
| UNITED KINGDOM | AUSTRALIA      | 1 |
| UNITED KINGDOM | BANGLADESH     | 1 |
| UNITED KINGDOM | BELGIUM        | 1 |
| UNITED KINGDOM | COLOMBIA       | 1 |
| UNITED KINGDOM | CZECH REPUBLIC | 1 |
| UNITED KINGDOM | DENMARK        | 4 |

|                |                |   |
|----------------|----------------|---|
| UNITED KINGDOM | FRANCE         | 5 |
| UNITED KINGDOM | INDIA          | 1 |
| UNITED KINGDOM | INDONESIA      | 1 |
| UNITED KINGDOM | IRAN           | 5 |
| UNITED KINGDOM | IRELAND        | 1 |
| UNITED KINGDOM | KOREA          | 1 |
| UNITED KINGDOM | LITHUANIA      | 1 |
| UNITED KINGDOM | NETHERLANDS    | 2 |
| UNITED KINGDOM | NEW ZEALAND    | 1 |
| UNITED KINGDOM | NORWAY         | 3 |
| UNITED KINGDOM | POLAND         | 2 |
| UNITED KINGDOM | ROMANIA        | 1 |
| UNITED KINGDOM | RUSSIA         | 1 |
| UNITED KINGDOM | SERBIA         | 1 |
| UNITED KINGDOM | SPAIN          | 1 |
| UNITED KINGDOM | SWEDEN         | 1 |
| UNITED KINGDOM | SWITZERLAND    | 1 |
| UNITED KINGDOM | TURKEY         | 1 |
| USA            | ARGENTINA      | 1 |
| USA            | AUSTRALIA      | 1 |
| USA            | BANGLADESH     | 2 |
| USA            | BRAZIL         | 1 |
| USA            | CANADA         | 5 |
| USA            | COLOMBIA       | 1 |
| USA            | CROATIA        | 2 |
| USA            | CZECH REPUBLIC | 2 |
| USA            | DENMARK        | 2 |
| USA            | FRANCE         | 3 |
| USA            | GERMANY        | 2 |
| USA            | INDIA          | 2 |
| USA            | ITALY          | 1 |
| USA            | JAPAN          | 1 |
| USA            | KOREA          | 2 |
| USA            | KUWAIT         | 1 |
| USA            | PAKISTAN       | 1 |
| USA            | RUSSIA         | 1 |
| USA            | SAUDI ARABIA   | 1 |
| USA            | SERBIA         | 2 |
| USA            | SPAIN          | 3 |
| USA            | SWEDEN         | 1 |
| USA            | TURKEY         | 1 |
| USA            | UNITED KINGDOM | 5 |
| VIETNAM        | MEXICO         | 1 |
| ARGENTINA      | URUGUAY        | 2 |

|            |                |   |
|------------|----------------|---|
| AUSTRALIA  | BANGLADESH     | 1 |
| AUSTRALIA  | BRUNEI         | 1 |
| AUSTRALIA  | EGYPT          | 1 |
| AUSTRALIA  | GHANA          | 1 |
| AUSTRALIA  | IRAN           | 1 |
| AUSTRALIA  | LITHUANIA      | 1 |
| AUSTRALIA  | MALAYSIA       | 1 |
| AUSTRALIA  | NORWAY         | 1 |
| AUSTRALIA  | PAKISTAN       | 1 |
| AUSTRALIA  | POLAND         | 1 |
| AUSTRALIA  | RUSSIA         | 2 |
| AUSTRALIA  | SAUDI ARABIA   | 1 |
| AUSTRALIA  | THAILAND       | 1 |
| AUSTRALIA  | VIETNAM        | 1 |
| BANGLADESH | BRUNEI         | 1 |
| BANGLADESH | EGYPT          | 1 |
| BANGLADESH | SAUDI ARABIA   | 1 |
| BELGIUM    | BOLIVIA        | 1 |
| BRAZIL     | ARGENTINA      | 1 |
| BRAZIL     | CHILE          | 1 |
| BRAZIL     | ECUADOR        | 2 |
| BRAZIL     | MEXICO         | 1 |
| BRAZIL     | PANAMA         | 1 |
| CANADA     | BRAZIL         | 1 |
| CANADA     | FINLAND        | 1 |
| CANADA     | FRANCE         | 1 |
| CANADA     | SPAIN          | 1 |
| CANADA     | SWEDEN         | 1 |
| CANADA     | SWITZERLAND    | 1 |
| CHILE      | PANAMA         | 1 |
| CHINA      | AUSTRALIA      | 7 |
| CHINA      | BANGLADESH     | 1 |
| CHINA      | BELGIUM        | 3 |
| CHINA      | CANADA         | 7 |
| CHINA      | COLOMBIA       | 1 |
| CHINA      | CZECH REPUBLIC | 2 |
| CHINA      | DENMARK        | 3 |
| CHINA      | EGYPT          | 1 |
| CHINA      | FINLAND        | 1 |
| CHINA      | GERMANY        | 2 |
| CHINA      | INDIA          | 3 |
| CHINA      | INDONESIA      | 2 |
| CHINA      | ITALY          | 2 |
| CHINA      | KOREA          | 3 |

|                |                |    |
|----------------|----------------|----|
| CHINA          | MALAYSIA       | 3  |
| CHINA          | NETHERLANDS    | 1  |
| CHINA          | NEW ZEALAND    | 1  |
| CHINA          | NORWAY         | 1  |
| CHINA          | PAKISTAN       | 1  |
| CHINA          | RUSSIA         | 1  |
| CHINA          | SAUDI ARABIA   | 2  |
| CHINA          | SPAIN          | 2  |
| CHINA          | SWEDEN         | 1  |
| CHINA          | SWITZERLAND    | 2  |
| CHINA          | THAILAND       | 2  |
| CHINA          | UNITED KINGDOM | 11 |
| CHINA          | USA            | 14 |
| CZECH REPUBLIC | SERBIA         | 1  |
| ECUADOR        | MEXICO         | 2  |
| EGYPT          | BRUNEI         | 1  |
| ESTONIA        | SLOVENIA       | 1  |
| FIJI           | BELIZE         | 1  |
| FINLAND        | AUSTRIA        | 1  |
| FINLAND        | SOUTH AFRICA   | 3  |
| FINLAND        | SWEDEN         | 1  |
| FINLAND        | SWITZERLAND    | 1  |
| FINLAND        | TANZANIA       | 1  |
| FRANCE         | BELGIUM        | 1  |
| FRANCE         | ECUADOR        | 1  |
| FRANCE         | KUWAIT         | 1  |
| FRANCE         | MEXICO         | 1  |
| FRANCE         | SWITZERLAND    | 2  |
| FRANCE         | TUNISIA        | 1  |
| FRANCE         | VIETNAM        | 3  |
| GERMANY        | CANADA         | 1  |
| GERMANY        | COSTA RICA     | 1  |
| GERMANY        | ESTONIA        | 1  |
| GERMANY        | FINLAND        | 4  |
| GERMANY        | FRANCE         | 1  |
| GERMANY        | INDIA          | 1  |
| GERMANY        | IRELAND        | 2  |
| GERMANY        | ITALY          | 5  |
| GERMANY        | NETHERLANDS    | 4  |
| GERMANY        | NEW ZEALAND    | 1  |
| GERMANY        | NIGERIA        | 2  |
| GERMANY        | NORWAY         | 6  |
| GERMANY        | ROMANIA        | 1  |
| GERMANY        | SOUTH AFRICA   | 2  |

|           |                |   |
|-----------|----------------|---|
| GERMANY   | SPAIN          | 1 |
| GERMANY   | SWEDEN         | 2 |
| GERMANY   | SWITZERLAND    | 2 |
| GERMANY   | UNITED KINGDOM | 3 |
| INDIA     | AUSTRALIA      | 1 |
| INDIA     | BANGLADESH     | 2 |
| INDIA     | BRUNEI         | 1 |
| INDIA     | CZECH REPUBLIC | 1 |
| INDIA     | EGYPT          | 1 |
| INDIA     | ETHIOPIA       | 1 |
| INDIA     | FINLAND        | 1 |
| INDIA     | JAPAN          | 1 |
| INDIA     | KOREA          | 2 |
| INDIA     | MALAYSIA       | 2 |
| INDIA     | MEXICO         | 2 |
| INDIA     | NETHERLANDS    | 1 |
| INDIA     | SAUDI ARABIA   | 3 |
| INDIA     | SOUTH AFRICA   | 1 |
| INDIA     | SWEDEN         | 1 |
| INDIA     | VIETNAM        | 1 |
| INDIA     | ZAMBIA         | 1 |
| INDONESIA | MALAYSIA       | 2 |
| INDONESIA | SAUDI ARABIA   | 1 |
| IRAN      | BELGIUM        | 1 |
| IRAN      | FRANCE         | 1 |
| IRAN      | LITHUANIA      | 2 |
| IRAN      | POLAND         | 3 |
| ITALY     | AUSTRALIA      | 1 |
| ITALY     | BRAZIL         | 1 |
| ITALY     | COSTA RICA     | 1 |
| ITALY     | FINLAND        | 1 |
| ITALY     | IRAN           | 1 |
| ITALY     | LITHUANIA      | 1 |
| ITALY     | POLAND         | 1 |
| ITALY     | RUSSIA         | 1 |
| ITALY     | SAUDI ARABIA   | 1 |
| ITALY     | SWEDEN         | 1 |
| ITALY     | SWITZERLAND    | 1 |
| JAPAN     | BANGLADESH     | 1 |
| JAPAN     | INDONESIA      | 1 |
| JAPAN     | MONGOLIA       | 1 |
| JAPAN     | RUSSIA         | 1 |
| JAPAN     | SOUTH AFRICA   | 1 |
| JAPAN     | THAILAND       | 2 |

|              |                 |   |
|--------------|-----------------|---|
| KOREA        | BANGLADESH      | 1 |
| KOREA        | EGYPT           | 1 |
| KOREA        | INDONESIA       | 1 |
| KOREA        | MALAYSIA        | 1 |
| KOREA        | SAUDI ARABIA    | 2 |
| KOREA        | ZAMBIA          | 1 |
| KUWAIT       | U ARAB EMIRATES | 1 |
| MALAYSIA     | BANGLADESH      | 1 |
| MALAYSIA     | BRUNEI          | 1 |
| MALAYSIA     | EGYPT           | 1 |
| MALAYSIA     | SAUDI ARABIA    | 2 |
| MALAYSIA     | SOUTH AFRICA    | 1 |
| MALAYSIA     | THAILAND        | 1 |
| MEXICO       | ETHIOPIA        | 1 |
| NETHERLANDS  | ETHIOPIA        | 1 |
| NETHERLANDS  | IRELAND         | 2 |
| NETHERLANDS  | NEW ZEALAND     | 1 |
| NETHERLANDS  | UKRAINE         | 1 |
| NORWAY       | CZECH REPUBLIC  | 1 |
| NORWAY       | DENMARK         | 1 |
| NORWAY       | NIGERIA         | 1 |
| PAKISTAN     | HUNGARY         | 1 |
| PAKISTAN     | SAUDI ARABIA    | 1 |
| POLAND       | LITHUANIA       | 2 |
| PORTUGAL     | AUSTRIA         | 1 |
| PORTUGAL     | BRAZIL          | 1 |
| PORTUGAL     | CZECH REPUBLIC  | 1 |
| RUSSIA       | NORWAY          | 2 |
| SAUDI ARABIA | BRUNEI          | 1 |
| SAUDI ARABIA | EGYPT           | 1 |
| SAUDI ARABIA | ZAMBIA          | 1 |
| SOUTH AFRICA | GHANA           | 1 |
| SPAIN        | ARGENTINA       | 1 |
| SPAIN        | BELGIUM         | 3 |
| SPAIN        | BELIZE          | 1 |
| SPAIN        | BRAZIL          | 2 |
| SPAIN        | CHILE           | 2 |
| SPAIN        | CZECH REPUBLIC  | 1 |
| SPAIN        | DENMARK         | 1 |
| SPAIN        | ECUADOR         | 1 |
| SPAIN        | FIJI            | 1 |
| SPAIN        | FINLAND         | 1 |
| SPAIN        | FRANCE          | 3 |
| SPAIN        | MEXICO          | 2 |



|                |                |   |
|----------------|----------------|---|
| SPAIN          | NORWAY         | 1 |
| SPAIN          | PANAMA         | 1 |
| SPAIN          | PORTUGAL       | 1 |
| SPAIN          | SAUDI ARABIA   | 2 |
| SPAIN          | SWITZERLAND    | 1 |
| SPAIN          | URUGUAY        | 1 |
| SWEDEN         | ICELAND        | 1 |
| SWEDEN         | IRELAND        | 1 |
| SWEDEN         | SAUDI ARABIA   | 1 |
| THAILAND       | NEPAL          | 2 |
| TURKEY         | CZECH REPUBLIC | 1 |
| TURKEY         | SERBIA         | 1 |
| UNITED KINGDOM | AUSTRALIA      | 1 |
| UNITED KINGDOM | BANGLADESH     | 1 |
| UNITED KINGDOM | BELGIUM        | 1 |
| UNITED KINGDOM | COLOMBIA       | 1 |
| UNITED KINGDOM | CZECH REPUBLIC | 1 |
| UNITED KINGDOM | DENMARK        | 4 |
| UNITED KINGDOM | FRANCE         | 5 |
| UNITED KINGDOM | INDIA          | 1 |
| UNITED KINGDOM | INDONESIA      | 1 |
| UNITED KINGDOM | IRAN           | 5 |
| UNITED KINGDOM | IRELAND        | 1 |
| UNITED KINGDOM | KOREA          | 1 |
| UNITED KINGDOM | LITHUANIA      | 1 |
| UNITED KINGDOM | NETHERLANDS    | 2 |
| UNITED KINGDOM | NEW ZEALAND    | 1 |
| UNITED KINGDOM | NORWAY         | 3 |
| UNITED KINGDOM | POLAND         | 2 |
| UNITED KINGDOM | ROMANIA        | 1 |
| UNITED KINGDOM | RUSSIA         | 1 |
| UNITED KINGDOM | SERBIA         | 1 |
| UNITED KINGDOM | SPAIN          | 1 |
| UNITED KINGDOM | SWEDEN         | 1 |
| UNITED KINGDOM | SWITZERLAND    | 1 |
| UNITED KINGDOM | TURKEY         | 1 |
| USA            | ARGENTINA      | 1 |
| USA            | AUSTRALIA      | 1 |
| USA            | BANGLADESH     | 2 |
| USA            | BRAZIL         | 1 |
| USA            | CANADA         | 5 |
| USA            | COLOMBIA       | 1 |
| USA            | CROATIA        | 2 |
| USA            | CZECH REPUBLIC | 2 |

|         |                |   |
|---------|----------------|---|
| USA     | DENMARK        | 2 |
| USA     | FRANCE         | 3 |
| USA     | GERMANY        | 2 |
| USA     | INDIA          | 2 |
| USA     | ITALY          | 1 |
| USA     | JAPAN          | 1 |
| USA     | KOREA          | 2 |
| USA     | KUWAIT         | 1 |
| USA     | PAKISTAN       | 1 |
| USA     | RUSSIA         | 1 |
| USA     | SAUDI ARABIA   | 1 |
| USA     | SERBIA         | 2 |
| USA     | SPAIN          | 3 |
| USA     | SWEDEN         | 1 |
| USA     | TURKEY         | 1 |
| USA     | UNITED KINGDOM | 5 |
| VIETNAM | MEXICO         | 1 |

---
